# Supplementary material for: A Prediction Modeling Based on the Hospital for Special Surgery (HSS) Knee Score for Poor Postoperative Functional Prognosis of Elderly Patients with Patellar Fractures
Source: Hindawi journal article supplement (doi:10.1155/2021/6620504), 2021-01-01
Supplement: f1 [file 6620504.f1.pdf]

## Original data of the paper

| This supplemental file is the original data for the 168 patients enrolled in the manuscript during preoperative and postoperative follow-up, which contains patient ID,functional outcome |            |                    |            |     |       |        |             |                 |                      |          |                |       |               |           |         |            |                       |    | R3,R6(Knee range of motion at 3,6 months postoperatively) |       |       |       |      |      |       |       |
|-------------------------------------------------------------------------------------------------------------------------------------------------------------------------------------------|------------|--------------------|------------|-----|-------|--------|-------------|-----------------|----------------------|----------|----------------|-------|---------------|-----------|---------|------------|-----------------------|----|-----------------------------------------------------------|-------|-------|-------|------|------|-------|-------|
| ,sarcopenia,age,affect side,cardiac disease,hypertensive disease,diabetes,hyperlipidemia,bmi,grip strength,tmCSA/ BW,albumin,hemoglobin,AO type,wait time for surgery,etal.               |            |                    |            |     |       |        |             |                 |                      |          |                |       |               |           |         |            |                       |    | HSS3,HSS6(HSS score at 3,6 months postoperatively)        |       |       |       |      |      |       |       |
| Number                                                                                                                                                                                    | Patient ID | Functional outcome | Sarcopenia | Age | ≥ 70y | Sex    | Affect side | Cardiac disease | Hypertensive disease | Diabetes | Hyperlipidemia | Bmi   | Grip strength | tmCSA/ BW | Albumin | Hemoglobin | Wait time for surgery | AO | R3                                                        | R6    | HSS 3 | HSS 6 | IS   | BP   | CA    | LFA   |
| 1                                                                                                                                                                                         | 1250859    | bad                | yes        | 81  | yes   | male   | left        | no              | yes                  | no       | no             | 17.21 | 20.4          | 1.27      | 41      | 134.6      | 4                     | 3  | 83.38                                                     | 92.83 | 64    | 68    | 1.14 | 0.74 | -5.15 | 6.73  |
| 2                                                                                                                                                                                         | 1280273    | good               | no         | 63  | no    | male   | right       | yes             | no                   | yes      | no             | 23.31 | 25.8          | 1.6       | 42.7    | 154        | 1                     | 3  | 73.24                                                     | 79.79 | 83    | 92    | 0.97 | 1.11 | 5.03  | 4.88  |
| 3                                                                                                                                                                                         | 1290430    | bad                | yes        | 84  | yes   | female | right       | no              | yes                  | yes      | no             | 19.53 | 10.5          | 1.22      | 38.4    | 105        | 3                     | 1  | 77.59                                                     | 85.38 | 59    | 65    | 1.15 | 0.66 | -2.28 | 8.32  |
| 4                                                                                                                                                                                         | 1290491    | good               | no         | 63  | no    | female | left        | no              | no                   | no       | yes            | 22.04 | 23.4          | 1.42      | 45.5    | 135        | 1                     | 2  | 83.79                                                     | 88.07 | 80    | 86    | 0.96 | 0.93 | 3.98  | 5.06  |
| 5                                                                                                                                                                                         | 1291468    | good               | no         | 61  | no    | female | right       | no              | no                   | yes      | no             | 32.79 | 21.2          | 1.18      | 40.2    | 126        | 4                     | 3  | 79.24                                                     | 82.41 | 85    | 94    | 0.9  | 0.94 | -3.55 | 7.38  |
| 6                                                                                                                                                                                         | 1298717    | bad                | yes        | 74  | yes   | female | left        | no              | no                   | no       | no             | 20.81 | 13.7          | 1.24      | 37.9    | 107        | 2                     | 2  | 77.03                                                     | 86.14 | 71    | 78    | 1.48 | 1.05 | 4.05  | 8.45  |
| 7                                                                                                                                                                                         | 1309677    | bad                | yes        | 90  | yes   | male   | right       | yes             | yes                  | no       | no             | 23.44 | 11.2          | 1.23      | 35.4    | 117        | 4                     | 3  | 73.03                                                     | 81.52 | 58    | 66    | 1    | 0.87 | 7.31  | 12.83 |
| 8                                                                                                                                                                                         | 1310910    | good               | no         | 62  | no    | male   | right       | yes             | yes                  | no       | yes            | 37.11 | 34.6          | 1.6       | 43      | 148        | 5                     | 3  | 70.55                                                     | 79.59 | 79    | 86    | 0.87 | 0.86 | -5.08 | 9.48  |
| 9                                                                                                                                                                                         | 1310912    | good               | no         | 63  | no    | female | right       | no              | no                   | no       | yes            | 20.83 | 22.3          | 1.26      | 44.3    | 127        | 5                     | 3  | 83.03                                                     | 88.9  | 81    | 87    | 0.97 | 0.93 | -4.39 | 9.27  |
| 10                                                                                                                                                                                        | 1319040    | bad                | yes        | 69  | no    | female | right       | no              | no                   | no       | yes            | 18.73 | 12.3          | 1.23      | 45.1    | 138        | 5                     | 1  | 85.79                                                     | 90.07 | 72    | 74    | 1.01 | 0.81 | 6.79  | 5.26  |
| 11                                                                                                                                                                                        | 1325781    | good               | no         | 78  | yes   | female | right       | no              | yes                  | no       | no             | 22.83 | 15.8          | 1.32      | 38.3    | 111        | 3                     | 3  | 74.69                                                     | 83.66 | 74    | 81    | 0.97 | 0.83 | -3.43 | 14.71 |
| 12                                                                                                                                                                                        | 1329822    | bad                | no         | 69  | no    | male   | left        | no              | yes                  | no       | no             | 21.22 | 25.2          | 1.61      | 32.9    | 135        | 1                     | 3  | 77.79                                                     | 83.79 | 72    | 77    | 0.98 | 0.83 | 6.02  | 6.93  |
| 13                                                                                                                                                                                        | 1338560    | good               | no         | 60  | no    | female | left        | no              | no                   | no       | no             | 23.88 | 25.8          | 1.28      | 45.7    | 121        | 4                     | 3  | 80.48                                                     | 84.41 | 87    | 97    | 0.75 | 0.99 | 6.69  | 2.15  |
| 14                                                                                                                                                                                        | 1340350    | good               | no         | 60  | no    | female | right       | no              | yes                  | no       | no             | 25.72 | 23.4          | 1.34      | 41.1    | 129        | 1                     | 3  | 82.97                                                     | 89.38 | 88    | 96    | 0.84 | 0.76 | -6.73 | 10.46 |
| 15                                                                                                                                                                                        | 1343665    | good               | no         | 77  | yes   | female | left        | no              | yes                  | no       | no             | 22.03 | 17.2          | 1.32      | 44      | 119        | 4                     | 3  | 74.97                                                     | 82.62 | 75    | 81    | 1.22 | 0.9  | -5.65 | 7.12  |
| 16                                                                                                                                                                                        | 1349370    | bad                | yes        | 64  | no    | female | left        | yes             | no                   | no       | no             | 20.58 | 15.9          | 1.21      | 41      | 122        | 2                     | 3  | 79.45                                                     | 88.76 | 76    | 78    | 0.93 | 0.86 | 1.6   | 2.65  |
| 17                                                                                                                                                                                        | 1349859    | good               | no         | 65  | no    | female | left        | no              | no                   | yes      | no             | 24.89 | 22.7          | 1.25      | 39      | 118        | 5                     | 3  | 81.52                                                     | 87.72 | 83    | 85    | 0.99 | 0.81 | 5.14  | 4.76  |
| 18                                                                                                                                                                                        | 1351467    | good               | no         | 69  | no    | female | left        | no              | no                   | yes      | no             | 20.4  | 19.5          | 1.6       | 44      | 110        | 2                     | 3  | 82.41                                                     | 86.28 | 77    | 85    | 0.73 | 0.58 | 5.48  | 9.24  |
| 19                                                                                                                                                                                        | 1351286    | good               | no         | 76  | yes   | female | left        | no              | no                   | no       | no             | 20.8  | 19.8          | 1.22      | 45.5    | 135        | 1                     | 3  | 75.31                                                     | 82    | 68    | 81    | 1.11 | 1.08 | 6.68  | 5.26  |
| 20                                                                                                                                                                                        | 1352667    | good               | no         | 62  | no    | male   | left        | yes             | yes                  | no       | no             | 23.14 | 36.4          | 1.72      | 41.7    | 144        | 3                     | 2  | 80.28                                                     | 86.07 | 80    | 90    | 0.96 | 0.85 | -4.56 | 6.12  |
| 21                                                                                                                                                                                        | 1354821    | good               | no         | 63  | no    | female | left        | no              | no                   | no       | no             | 28.13 | 21.5          | 1.28      | 46.1    | 136        | 2                     | 3  | 69.72                                                     | 76.07 | 82    | 92    | 0.81 | 0.76 | 8.04  | 8.11  |
| 22                                                                                                                                                                                        | 1358306    | bad                | no         | 68  | no    | male   | right       | no              | yes                  | no       | no             | 22.49 | 35.6          | 1.35      | 40.5    | 146        | 3                     | 3  | 75.72                                                     | 82.9  | 72    | 76    | 1.05 | 0.67 | -2.12 | 3.18  |
| 23                                                                                                                                                                                        | 1359575    | good               | no         | 61  | no    | female | left        | yes             | no                   | no       | yes            | 25.4  | 22.9          | 1.32      | 47      | 151        | 3                     | 3  | 77.59                                                     | 83.93 | 83    | 89    | 0.72 | 1.09 | 4.58  | 6.63  |
| 24                                                                                                                                                                                        | 1359704    | good               | no         | 62  | no    | male   | right       | no              | no                   | yes      | yes            | 27.68 | 37.3          | 1.4       | 42.2    | 158        | 3                     | 3  | 82.21                                                     | 89.86 | 79    | 86    | 0.76 | 0.78 | 3.39  | 3.45  |
| 25                                                                                                                                                                                        | 1363889    | good               | no         | 62  | no    | female | left        | no              | no                   | no       | no             | 21.48 | 23.2          | 1.32      | 44.7    | 150        | 3                     | 1  | 83.17                                                     | 90.48 | 71    | 81    | 1.02 | 0.95 | 6.67  | 4.12  |
| 26                                                                                                                                                                                        | 1365687    | good               | no         | 70  | yes   | female | left        | yes             | no                   | no       | no             | 24.03 | 18.4          | 1.32      | 41.1    | 110        | 3                     | 3  | 75.31                                                     | 79.59 | 76    | 83    | 0.84 | 0.79 | -0.98 | 5.64  |
| 27                                                                                                                                                                                        | 1368393    | good               | no         | 61  | no    | female | right       | no              | no                   | yes      | yes            | 23.44 | 20.3          | 1.38      | 43.6    | 152        | 3                     | 3  | 79.52                                                     | 86.83 | 80    | 86    | 1.02 | 0.99 | 4.34  | 3.08  |
| 28                                                                                                                                                                                        | 1370529    | good               | no         | 62  | no    | female | left        | yes             | no                   | no       | yes            | 24.22 | 17.8          | 1.26      | 49.8    | 115        | 5                     | 3  | 80.48                                                     | 86.07 | 80    | 90    | 0.96 | 0.67 | -4.82 | 6.34  |
| 29                                                                                                                                                                                        | 1375080    | bad                | yes        | 85  | yes   | female | left        | no              | yes                  | yes      | yes            | 16.65 | 12.4          | 1.25      | 44.2    | 121        | 3                     | 3  | 87.31                                                     | 90.62 | 62    | 68    | 1.03 | 0.83 | 5.88  | 8.26  |
| 30                                                                                                                                                                                        | 1377364    | good               | yes        | 64  | no    | male   | right       | yes             | no                   | no       | no             | 20.76 | 20.6          | 1.4       | 40.6    | 151        | 4                     | 3  | 77.59                                                     | 85.59 | 83    | 86    | 1.13 | 1.05 | 2.82  | 7.86  |
| 31                                                                                                                                                                                        | 1377411    | bad                | yes        | 67  | no    | female | left        | yes             | no                   | yes      | no             | 19.53 | 15.1          | 1.23      | 40.2    | 122        | 3                     | 3  | 74.28                                                     | 83.1  | 71    | 76    | 0.98 | 0.82 | 3.05  | 4.18  |
| 32                                                                                                                                                                                        | 1378576    | good               | no         | 61  | no    | female | left        | yes             | yes                  | yes      | no             | 24.84 | 23.5          | 1.32      | 40.9    | 125        | 2                     | 1  | 77.38                                                     | 81.03 | 85    | 93    | 0.81 | 1.11 | 4.3   | 6.94  |
| 33                                                                                                                                                                                        | 1378636    | good               | yes        | 60  | no    | female | left        | no              | no                   | no       | yes            | 17.58 | 13.7          | 1.25      | 43      | 116        | 4                     | 1  | 82.62                                                     | 88.48 | 79    | 82    | 0.8  | 0.85 | -3.93 | 5.29  |
| 34                                                                                                                                                                                        | 1378666    | good               | no         | 61  | no    | female | left        | no              | no                   | no       | no             | 24.65 | 21.4          | 1.46      | 43.3    | 124        | 3                     | 1  | 82                                                        | 86.97 | 85    | 91    | 0.95 | 0.68 | 5.02  | 5.93  |
| 35                                                                                                                                                                                        | 1380991    | good               | no         | 60  | no    | male   | right       | yes             | no                   | no       | no             | 24.93 | 34.5          | 1.59      | 39.7    | 151        | 1                     | 3  | 80.76                                                     | 90.55 | 89    | 94    | 0.98 | 0.88 | -3.06 | 7.64  |
| 36                                                                                                                                                                                        | 1381811    | bad                | no         | 63  | no    | female | left        | no              | no                   | no       | no             | 19.05 | 22.3          | 1.35      | 47.9    | 137        | 1                     | 3  | 84.69                                                     | 89.66 | 72    | 76    | 0.93 | 0.76 | 3.48  | 9.16  |
| 37                                                                                                                                                                                        | 1386510    | good               | no         | 61  | no    | female | right       | no              | no                   | no       | yes            | 26.18 | 19.1          | 1.28      | 43.7    | 148        | 2                     | 3  | 73.31                                                     | 78.34 | 85    | 94    | 1.2  | 0.84 | 2.33  | 6.97  |
| 38                                                                                                                                                                                        | 1389678    | good               | yes        | 60  | no    | female | right       | no              | no                   | no       | no             | 19.53 | 17.2          | 1.21      | 44.3    | 128        | 5                     | 3  | 77.38                                                     | 82.62 | 82    | 85    | 0.77 | 1.22 | 4.16  | 9.85  |
| 39                                                                                                                                                                                        | 1392523    | good               | no         | 63  | no    | male   | left        | no              | no                   | yes      | no             | 31.35 | 30.4          | 1.37      | 47.6    | 158        | 4                     | 3  | 74.62                                                     | 79.86 | 83    | 96    | 1.2  | 0.97 | 0.22  | 10.12 |
| 40                                                                                                                                                                                        | 1394612    | good               | no         | 64  | no    | male   | left        | no              | no                   | no       | no             | 25.39 | 33.9          | 1.6       | 43.2    | 135        | 4                     | 3  | 74.28                                                     | 82.21 | 76    | 85    | 1.23 | 0.82 | 4.13  | 3.49  |
| 41                                                                                                                                                                                        | 1397633    | good               | no         | 60  | no    | male   | left        | no              | no                   | yes      | no             | 26.3  | 36.7          | 1.36      | 43.4    | 134        | 4                     | 2  | 72.41                                                     | 76.9  | 88    | 96    | 1.35 | 0.78 | -2.99 | 4.75  |

| Number | Patient ID | Functional outcome | Sarcopenia | Age | ≥ 70y | Sex    | Affect side | Cardiac disease | Hypertensive disease | Diabetes | Hyperlipidemia | Bmi   | Grip strength | tmCSA/BW | Albumin | Hemoglobin | Wait time for surgery | AO | R3    | R6    | HSS 3 | HSS 6 | IS   | BP   | CA    | LFA   |
|--------|------------|--------------------|------------|-----|-------|--------|-------------|-----------------|----------------------|----------|----------------|-------|---------------|----------|---------|------------|-----------------------|----|-------|-------|-------|-------|------|------|-------|-------|
| 42     | 1398175    | good               | no         | 76  | yes   | female | left        | yes             | no                   | no       | no             | 24.44 | 15.3          | 1.28     | 42.6    | 138        | 1                     | 1  | 76.62 | 83.38 | 75    | 84    | 0.91 | 0.92 | 6.66  | 9.18  |
| 43     | 1401149    | bad                | yes        | 70  | yes   | female | left        | no              | no                   | no       | no             | 20    | 10.3          | 1.22     | 46.5    | 129        | 4                     | 3  | 68.14 | 77.17 | 61    | 67    | 0.84 | 0.77 | -3.35 | 5.64  |
| 44     | 1399585    | good               | no         | 71  | yes   | female | right       | yes             | yes                  | no       | no             | 28    | 18.6          | 1.37     | 41.7    | 135        | 1                     | 3  | 72.07 | 79.79 | 77    | 82    | 1.1  | 0.9  | 6.66  | 10.28 |
| 45     | 1401346    | good               | no         | 61  | no    | female | left        | no              | no                   | no       | yes            | 26.93 | 18.5          | 1.26     | 43.2    | 148        | 1                     | 3  | 73.38 | 77.59 | 80    | 90    | 0.75 | 0.87 | 0.15  | 8.42  |
| 46     | 1402769    | bad                | no         | 65  | no    | female | left        | no              | no                   | no       | no             | 18.9  | 16.2          | 1.49     | 41.3    | 117        | 2                     | 1  | 82.83 | 92.21 | 70    | 80    | 1.23 | 0.71 | 4.9   | 5.36  |
| 47     | 1403349    | good               | no         | 63  | no    | female | left        | no              | no                   | no       | no             | 19.95 | 19.7          | 1.24     | 42.7    | 126        | 2                     | 3  | 81.72 | 93.03 | 74    | 83    | 1.13 | 0.78 | -1.99 | 9.98  |
| 48     | 1404488    | good               | no         | 63  | no    | female | left        | no              | no                   | no       | no             | 23.88 | 22.4          | 1.35     | 47.6    | 146        | 4                     | 3  | 80.14 | 83.66 | 84    | 90    | 0.92 | 0.77 | 3.86  | 6.48  |
| 49     | 1405480    | good               | no         | 76  | yes   | female | left        | no              | no                   | yes      | no             | 21.48 | 13.3          | 1.4      | 44.9    | 132        | 2                     | 3  | 76.97 | 81.66 | 76    | 83    | 1.02 | 0.9  | 5.59  | 7.45  |
| 50     | 1408808    | bad                | yes        | 64  | no    | female | left        | yes             | yes                  | no       | yes            | 24.86 | 13.2          | 1.11     | 45.4    | 153        | 6                     | 2  | 69.17 | 74.76 | 75    | 80    | 1.25 | 0.71 | 2.36  | 5.62  |
| 51     | 1411126    | bad                | yes        | 65  | no    | female | right       | no              | no                   | no       | no             | 18.07 | 17.1          | 1.24     | 40.8    | 117        | 1                     | 2  | 79.66 | 83.17 | 73    | 77    | 0.93 | 1.09 | -1.83 | 9.82  |
| 52     | 1415155    | good               | yes        | 62  | no    | female | left        | no              | no                   | no       | no             | 20.4  | 12.5          | 1.24     | 42.4    | 135        | 2                     | 2  | 77.72 | 82.21 | 80    | 83    | 0.91 | 0.71 | 4.27  | 2.34  |
| 53     | 1420645    | good               | no         | 62  | no    | female | left        | yes             | no                   | yes      | yes            | 24.03 | 15.1          | 1.44     | 41.4    | 117        | 2                     | 1  | 77.66 | 84.97 | 81    | 90    | 0.79 | 1.47 | -0.04 | 8.24  |
| 54     | 1422159    | good               | no         | 67  | no    | male   | right       | yes             | no                   | no       | no             | 21.22 | 24.3          | 1.68     | 43.7    | 146        | 5                     | 3  | 71.93 | 77.79 | 71    | 81    | 0.87 | 0.75 | 4.07  | 8.65  |
| 55     | 1422163    | good               | yes        | 60  | no    | female | left        | no              | no                   | no       | no             | 30.82 | 13.6          | 1.07     | 39.2    | 135        | 2                     | 2  | 72.28 | 78.69 | 78    | 83    | 1.17 | 0.56 | 3.56  | 6.45  |
| 56     | 1425769    | good               | no         | 68  | no    | female | left        | no              | no                   | no       | no             | 20.96 | 16.3          | 1.35     | 40.3    | 117        | 2                     | 3  | 77.24 | 84.48 | 73    | 83    | 0.88 | 1.06 | 3.57  | 4.32  |
| 57     | 1428133    | good               | no         | 60  | no    | male   | left        | no              | no                   | yes      | yes            | 24.49 | 36.7          | 1.49     | 42.8    | 132        | 4                     | 3  | 70.69 | 76.83 | 87    | 93    | 0.85 | 0.67 | 5.06  | 11.45 |
| 58     | 1428952    | bad                | yes        | 63  | no    | male   | right       | yes             | no                   | no       | no             | 22.84 | 22.8          | 1.24     | 39.3    | 156        | 4                     | 3  | 77.03 | 81.1  | 73    | 79    | 0.8  | 1.54 | 5.11  | 4.75  |
| 59     | 1429359    | good               | no         | 63  | no    | male   | left        | no              | no                   | no       | yes            | 26.99 | 33.3          | 1.59     | 49.3    | 140        | 1                     | 3  | 78.07 | 84.97 | 82    | 92    | 1.15 | 0.72 | -4.74 | 10.37 |
| 60     | 1429837    | good               | no         | 63  | no    | female | left        | yes             | no                   | no       | yes            | 25.4  | 20.5          | 1.28     | 47      | 151        | 3                     | 3  | 79.79 | 87.45 | 94    | 96    | 0.84 | 1.32 | 3.76  | 6.4   |
| 61     | 1431246    | good               | no         | 61  | no    | male   | right       | no              | no                   | yes      | yes            | 31.14 | 27.4          | 1.28     | 42.2    | 158        | 3                     | 2  | 77.86 | 83.79 | 92    | 96    | 0.8  | 1.02 | 3.32  | 12.76 |
| 62     | 1432170    | good               | no         | 64  | no    | female | left        | no              | no                   | yes      | yes            | 23.24 | 16.8          | 1.37     | 41.1    | 126        | 1                     | 3  | 81.66 | 89.38 | 86    | 95    | 0.91 | 1.09 | -3.13 | 7.26  |
| 63     | 1432586    | good               | no         | 63  | no    | male   | left        | no              | no                   | no       | no             | 26.83 | 35.2          | 1.62     | 44      | 133        | 4                     | 1  | 78.76 | 88.34 | 80    | 86    | 0.98 | 0.96 | -3.82 | 6.54  |
| 64     | 1434082    | good               | no         | 61  | no    | female | left        | no              | no                   | no       | no             | 19.53 | 15.7          | 1.44     | 42.2    | 135        | 4                     | 2  | 82.41 | 90.97 | 74    | 84    | 0.88 | 0.75 | 4.7   | 8.16  |
| 65     | 1434359    | good               | no         | 62  | no    | female | right       | no              | no                   | no       | no             | 22.04 | 20.3          | 1.29     | 48.3    | 124        | 2                     | 3  | 76.28 | 85.1  | 81    | 93    | 1.02 | 0.99 | 4.61  | 7.73  |
| 66     | 1434764    | bad                | no         | 60  | no    | male   | left        | yes             | no                   | no       | no             | 29.32 | 38.5          | 1.6      | 44.2    | 147        | 2                     | 3  | 72.48 | 80.21 | 70    | 80    | 0.96 | 0.9  | -4.06 | 5.12  |
| 67     | 1436578    | good               | no         | 66  | no    | female | left        | yes             | no                   | no       | no             | 23.66 | 18.1          | 1.22     | 47.2    | 132        | 1                     | 3  | 77.72 | 85.93 | 84    | 93    | 0.97 | 1.06 | 5.74  | 3.46  |
| 68     | 1436758    | bad                | yes        | 68  | no    | female | left        | yes             | no                   | no       | no             | 19.53 | 16.4          | 1.21     | 41.8    | 133        | 5                     | 3  | 78.83 | 87.38 | 61    | 67    | 0.98 | 0.93 | 1.37  | 8.2   |
| 69     | 1437148    | bad                | yes        | 80  | yes   | female | right       | no              | yes                  | no       | no             | 24.82 | 15.1          | 1.12     | 41      | 110        | 3                     | 3  | 70.48 | 76.69 | 75    | 79    | 1.07 | 0.82 | -5.93 | 7.41  |
| 70     | 1437458    | good               | no         | 63  | no    | male   | right       | no              | no                   | no       | yes            | 27.92 | 33.8          | 1.19     | 39.4    | 138        | 1                     | 3  | 71.38 | 78.69 | 88    | 95    | 0.71 | 1.16 | -1.94 | 3.59  |
| 71     | 1438979    | good               | no         | 67  | no    | male   | left        | no              | no                   | no       | yes            | 24.51 | 24.3          | 1.21     | 41.3    | 152        | 3                     | 3  | 76.48 | 83.24 | 76    | 83    | 1.02 | 0.76 | 2.5   | 5.1   |
| 72     | 1439505    | good               | no         | 68  | no    | male   | left        | no              | no                   | no       | no             | 23.15 | 25.9          | 1.33     | 43.1    | 129        | 6                     | 3  | 77.52 | 86.62 | 75    | 82    | 0.72 | 1.12 | 5.72  | 4.07  |
| 73     | 1440078    | bad                | yes        | 86  | yes   | female | left        | no              | no                   | no       | yes            | 16.44 | 13.2          | 1.25     | 41.3    | 119        | 2                     | 3  | 75.79 | 82    | 56    | 63    | 0.98 | 0.75 | 1.83  | 5.35  |
| 74     | 1440252    | bad                | no         | 67  | no    | female | left        | no              | yes                  | yes      | no             | 39.45 | 19.6          | 1.05     | 41.3    | 124        | 3                     | 1  | 73.45 | 78.07 | 77    | 80    | 1.11 | 1.15 | -0.02 | 3.75  |
| 75     | 1442294    | bad                | yes        | 79  | yes   | female | right       | yes             | no                   | yes      | yes            | 22.22 | 14.7          | 1.23     | 39.2    | 104        | 1                     | 1  | 76.28 | 82.9  | 60    | 68    | 1.13 | 0.96 | 4.26  | 5.26  |
| 76     | 1447291    | good               | no         | 61  | no    | male   | right       | yes             | yes                  | no       | no             | 19.66 | 35.8          | 1.67     | 39.7    | 151        | 1                     | 3  | 83.24 | 90.34 | 72    | 82    | 1.06 | 0.83 | -1.15 | 7.32  |
| 77     | 1447375    | good               | no         | 61  | no    | male   | left        | no              | yes                  | no       | no             | 23.89 | 37.2          | 1.6      | 42.4    | 139        | 3                     | 3  | 74.34 | 83.72 | 90    | 94    | 0.88 | 0.85 | -2.37 | 8.55  |
| 78     | 1447622    | good               | yes        | 70  | yes   | male   | left        | no              | no                   | no       | no             | 24.49 | 21.3          | 1.25     | 37.9    | 158        | 2                     | 3  | 75.38 | 80.9  | 78    | 84    | 0.91 | 0.77 | 2.95  | 11.37 |
| 79     | 1447612    | good               | no         | 69  | no    | female | left        | no              | yes                  | yes      | no             | 22.03 | 14.5          | 1.22     | 41.1    | 119        | 2                     | 3  | 66.48 | 72.62 | 76    | 81    | 1.07 | 0.92 | 5     | 6.58  |
| 80     | 1447732    | good               | no         | 60  | no    | female | right       | no              | no                   | yes      | no             | 21.48 | 21.1          | 1.48     | 46.3    | 142        | 5                     | 3  | 82.62 | 88.62 | 93    | 96    | 1.56 | 1.4  | -3.82 | 6.32  |
| 81     | 1453374    | bad                | no         | 64  | no    | male   | right       | yes             | yes                  | no       | no             | 16.65 | 31.4          | 1.56     | 37.5    | 104        | 2                     | 1  | 82.97 | 90.28 | 68    | 74    | 1.29 | 1.11 | 2.72  | 2.66  |
| 82     | 1453821    | good               | no         | 61  | no    | female | left        | no              | no                   | no       | no             | 21.19 | 19.5          | 1.32     | 46      | 127        | 1                     | 3  | 77.66 | 83.93 | 89    | 96    | 1.02 | 1.02 | -3.01 | 8.08  |
| 83     | 1454506    | good               | no         | 60  | no    | female | left        | no              | yes                  | no       | yes            | 19.78 | 20.9          | 1.45     | 49.9    | 144        | 1                     | 1  | 84.21 | 90.76 | 75    | 86    | 0.85 | 1.03 | -1.43 | 3.25  |
| 84     | 1455242    | good               | no         | 72  | yes   | female | left        | no              | no                   | yes      | no             | 29.69 | 16.7          | 1.04     | 45.1    | 124        | 4                     | 3  | 78.28 | 81.52 | 75    | 87    | 0.84 | 0.93 | 4.35  | 12.37 |
| 85     | 1456366    | good               | yes        | 60  | no    | female | right       | no              | no                   | no       | no             | 17.97 | 11.6          | 1.25     | 41.5    | 122        | 2                     | 3  | 87.03 | 91.66 | 81    | 88    | 1.02 | 1.06 | 4.49  | 8.48  |
| 86     | 1456992    | bad                | yes        | 79  | yes   | male   | right       | no              | no                   | no       | no             | 18.29 | 18.7          | 1.5      | 37      | 129        | 5                     | 3  | 75.66 | 84.41 | 71    | 72    | 1.17 | 0.89 | 5.41  | 3.28  |
| 87     | 1458449    | bad                | yes        | 66  | no    | female | left        | yes             | yes                  | yes      | no             | 19.92 | 13.3          | 1.24     | 39.3    | 130        | 1                     | 1  | 85.03 | 89.38 | 75    | 78    | 1.1  | 0.7  | 3.92  | 8.42  |
| 88     | 1461896    | good               | no         | 69  | no    | male   | left        | no              | no                   | no       | yes            | 24.49 | 31            | 1.15     | 43.7    | 144        | 6                     | 3  | 79.17 | 83.1  | 78    | 84    | 1.06 | 0.99 | -2.93 | 6.54  |

| Number | Patient ID | Functional outcome | Sarcopenia | Age | ≥ 70y | Sex    | Affect side | Cardiac disease | Hypertensive disease | Diabetes | Hyperlipidemia | Bmi   | Grip strength | tmCSA/BW | Albumin | Hemoglobin | Wait time for surgery | AO | R3    | R6    | HSS 3 | HSS 6 | IS   | BP   | CA    | LFA   |
|--------|------------|--------------------|------------|-----|-------|--------|-------------|-----------------|----------------------|----------|----------------|-------|---------------|----------|---------|------------|-----------------------|----|-------|-------|-------|-------|------|------|-------|-------|
| 89     | 1462223    | good               | no         | 68  | no    | female | left        | no              | yes                  | no       | no             | 25.61 | 14.9          | 1.28     | 40.6    | 147        | 1                     | 1  | 74.83 | 81.86 | 72    | 82    | 0.91 | 0.91 | 5.19  | 6.27  |
| 90     | 1464275    | good               | no         | 82  | yes   | female | left        | no              | no                   | yes      | no             | 22.55 | 18.4          | 1.46     | 42.4    | 137        | 6                     | 3  | 72.07 | 80.97 | 82    | 91    | 1.14 | 0.75 | 4.41  | 6.81  |
| 91     | 1466065    | good               | no         | 61  | no    | female | right       | no              | no                   | no       | no             | 25.71 | 20.1          | 1.28     | 39.1    | 108        | 4                     | 1  | 73.93 | 80.21 | 74    | 83    | 1.12 | 0.99 | 2.42  | 5.2   |
| 92     | 1467739    | good               | yes        | 61  | no    | female | left        | yes             | no                   | no       | no             | 20.2  | 13.5          | 1.23     | 41.2    | 137        | 2                     | 3  | 73.52 | 82.41 | 80    | 83    | 1.04 | 1.08 | 2.15  | 3.46  |
| 93     | 1471112    | good               | no         | 60  | no    | male   | left        | no              | no                   | yes      | yes            | 20.52 | 29.3          | 1.7      | 41.5    | 133        | 1                     | 3  | 86.41 | 91.38 | 86    | 94    | 0.98 | 0.88 | 5.62  | 8.55  |
| 94     | 1473652    | bad                | yes        | 69  | no    | female | right       | no              | no                   | no       | no             | 16.44 | 11.8          | 1.25     | 35      | 120        | 1                     | 3  | 76.07 | 82.83 | 70    | 76    | 0.91 | 0.9  | -3.29 | 6.25  |
| 95     | 1474880    | bad                | no         | 63  | no    | male   | left        | no              | no                   | no       | no             | 24.22 | 34.6          | 1.65     | 36.7    | 144        | 3                     | 3  | 77.79 | 84.97 | 69    | 76    | 1.14 | 0.91 | 4.96  | 5.31  |
| 96     | 1476317    | bad                | no         | 76  | yes   | female | right       | no              | no                   | no       | yes            | 21.5  | 17.1          | 1.22     | 37.9    | 137        | 4                     | 2  | 70.83 | 77.17 | 68    | 79    | 1.12 | 1.18 | 5.05  | 7.2   |
| 97     | 1476802    | good               | no         | 63  | no    | female | right       | yes             | no                   | no       | yes            | 27.01 | 20.2          | 1.27     | 40      | 129        | 3                     | 1  | 77.31 | 84.62 | 84    | 92    | 1.04 | 0.93 | 5.51  | 7.85  |
| 98     | 1479952    | good               | no         | 69  | no    | female | left        | no              | no                   | yes      | yes            | 28    | 15.2          | 1.59     | 41.3    | 140        | 1                     | 3  | 76.83 | 83.79 | 83    | 91    | 1.22 | 0.75 | -4.02 | 9.46  |
| 99     | 1483943    | good               | no         | 68  | no    | female | right       | no              | yes                  | no       | no             | 22.27 | 21.1          | 1.24     | 41.4    | 125        | 2                     | 1  | 71.17 | 78.41 | 80    | 87    | 0.95 | 1.51 | 5.59  | 5.36  |
| 100    | 1487936    | good               | no         | 68  | no    | male   | right       | no              | yes                  | no       | no             | 21.72 | 29.1          | 1.74     | 45.5    | 149        | 1                     | 3  | 72.55 | 77.45 | 85    | 92    | 0.83 | 0.93 | -3.93 | 6.29  |
| 101    | 1488462    | bad                | no         | 61  | no    | male   | left        | no              | no                   | yes      | no             | 24.98 | 33.2          | 1.61     | 37.6    | 148        | 2                     | 2  | 78.83 | 83.03 | 70    | 79    | 1.03 | 0.71 | 5.91  | 8.32  |
| 102    | 1488539    | good               | no         | 60  | no    | male   | left        | no              | no                   | no       | no             | 21.08 | 36.9          | 1.76     | 42.7    | 147        | 2                     | 3  | 81.1  | 88.69 | 81    | 94    | 0.96 | 0.88 | -1.13 | 3.54  |
| 103    | 1489862    | bad                | no         | 70  | yes   | female | left        | no              | no                   | no       | yes            | 21.63 | 17.3          | 1.45     | 45.2    | 130        | 3                     | 3  | 77.59 | 81.45 | 75    | 79    | 0.9  | 0.76 | 6.57  | 6.87  |
| 104    | 1491003    | bad                | yes        | 71  | yes   | male   | right       | yes             | no                   | yes      | no             | 23.05 | 18.1          | 1.29     | 41.7    | 144        | 5                     | 3  | 74.69 | 81.86 | 72    | 80    | 0.9  | 1.14 | 2.88  | 5.3   |
| 105    | 1495615    | bad                | yes        | 72  | yes   | female | right       | no              | yes                  | yes      | no             | 23.11 | 11.3          | 1.21     | 37.6    | 122        | 2                     | 3  | 67.93 | 75.59 | 65    | 67    | 1.06 | 0.87 | 5.21  | 6.75  |
| 106    | 1496435    | good               | no         | 62  | no    | female | left        | no              | no                   | no       | no             | 21.83 | 19.5          | 1.23     | 47.1    | 133        | 1                     | 3  | 84.07 | 92.9  | 91    | 96    | 1.12 | 0.96 | -4.46 | 4.34  |
| 107    | 1497785    | good               | no         | 61  | no    | female | left        | no              | no                   | no       | yes            | 23.31 | 25            | 1.31     | 48.3    | 138        | 1                     | 3  | 79.86 | 85.03 | 93    | 98    | 0.85 | 0.96 | 4.67  | 5.26  |
| 108    | 1498745    | bad                | no         | 60  | no    | female | left        | yes             | no                   | no       | no             | 20.2  | 20.9          | 1.63     | 33.9    | 114        | 3                     | 3  | 82.28 | 90.69 | 68    | 76    | 1.08 | 0.81 | 5.18  | 2.98  |
| 109    | 1499170    | good               | yes        | 65  | no    | male   | left        | no              | no                   | no       | no             | 18.59 | 23.4          | 1.57     | 35.1    | 145        | 1                     | 3  | 82.28 | 88.55 | 79    | 85    | 1.1  | 0.97 | 7.13  | 3.76  |
| 110    | 1502285    | good               | no         | 61  | no    | female | left        | no              | no                   | no       | yes            | 23.42 | 20.1          | 1.36     | 44.6    | 129        | 2                     | 3  | 78.76 | 86.07 | 89    | 92    | 0.78 | 1.18 | -3.13 | 4.26  |
| 111    | 1502191    | good               | no         | 61  | no    | female | left        | no              | no                   | no       | no             | 20.31 | 18.7          | 1.22     | 37.6    | 131        | 2                     | 3  | 84.69 | 94.21 | 86    | 94    | 1.02 | 0.73 | 5.65  | 7.11  |
| 112    | 1503506    | good               | no         | 64  | no    | female | left        | yes             | no                   | no       | no             | 24.16 | 13.4          | 1.27     | 44.3    | 129        | 1                     | 1  | 77.86 | 82.34 | 83    | 92    | 0.98 | 0.81 | 3.49  | 8.27  |
| 113    | 1503858    | bad                | no         | 67  | no    | male   | right       | no              | yes                  | no       | no             | 23.36 | 25.9          | 1.61     | 35.8    | 155        | 1                     | 3  | 76.21 | 84.48 | 65    | 75    | 1.12 | 0.86 | 6.27  | 4.4   |
| 114    | 1504705    | bad                | yes        | 77  | yes   | female | left        | yes             | no                   | no       | no             | 19.92 | 13.8          | 1.22     | 35.6    | 114        | 3                     | 1  | 80.97 | 84.97 | 66    | 72    | 1.08 | 0.79 | -5.31 | 5.43  |
| 115    | 1505007    | good               | no         | 73  | yes   | female | left        | yes             | yes                  | no       | no             | 20.28 | 16.6          | 1.37     | 49.1    | 138        | 1                     | 2  | 76.97 | 81.52 | 76    | 83    | 1.12 | 0.9  | 7.55  | 3.63  |
| 116    | 1508984    | good               | no         | 65  | no    | female | left        | no              | no                   | no       | no             | 21.09 | 15.7          | 1.46     | 40      | 124        | 3                     | 2  | 72.62 | 79.1  | 87    | 94    | 1.02 | 0.85 | 4.69  | 6.23  |
| 117    | 1510544    | good               | no         | 60  | no    | male   | left        | no              | no                   | no       | yes            | 23.04 | 35.8          | 1.63     | 43.3    | 140        | 4                     | 1  | 84.62 | 92.48 | 86    | 92    | 1.04 | 0.93 | -5.06 | 7.85  |
| 118    | 1511551    | good               | no         | 61  | no    | female | left        | yes             | yes                  | no       | no             | 22.13 | 15.8          | 1.42     | 35.5    | 119        | 2                     | 3  | 77.24 | 84.76 | 72    | 84    | 1.22 | 0.86 | 7.16  | 5.23  |
| 119    | 1514963    | good               | no         | 75  | yes   | male   | left        | no              | no                   | no       | no             | 19.61 | 32.1          | 1.48     | 36.7    | 129        | 3                     | 3  | 76.83 | 83.03 | 75    | 81    | 1.21 | 1.06 | -3.35 | 6.62  |
| 120    | 1517385    | good               | no         | 70  | yes   | female | left        | no              | yes                  | yes      | no             | 28.58 | 14.5          | 1.26     | 41.2    | 130        | 1                     | 1  | 75.38 | 82.41 | 73    | 82    | 0.91 | 0.71 | 7.15  | 7.44  |
| 121    | 1517828    | good               | no         | 70  | yes   | male   | left        | no              | yes                  | no       | yes            | 25.39 | 32.2          | 1.3      | 38.3    | 142        | 3                     | 3  | 74.07 | 81.59 | 71    | 83    | 1.17 | 1.04 | 0.02  | 10.65 |
| 122    | 1518282    | bad                | yes        | 90  | yes   | female | left        | yes             | yes                  | no       | yes            | 19.23 | 10.2          | 1.22     | 39.7    | 130        | 2                     | 2  | 79.1  | 82.14 | 62    | 69    | 0.81 | 0.83 | 4.9   | 7.37  |
| 123    | 1522001    | good               | no         | 68  | no    | female | right       | yes             | yes                  | no       | yes            | 22.48 | 20.3          | 1.17     | 40.2    | 105        | 3                     | 2  | 81.45 | 90.48 | 80    | 85    | 1.34 | 0.86 | -1.85 | 9.32  |
| 124    | 1522777    | good               | no         | 60  | no    | male   | left        | no              | no                   | no       | no             | 20.02 | 36.5          | 1.64     | 39.7    | 133        | 2                     | 3  | 82.28 | 89.66 | 85    | 93    | 0.98 | 0.83 | 5.73  | 5.58  |
| 125    | 1523409    | good               | yes        | 62  | no    | male   | right       | no              | no                   | no       | no             | 20.96 | 22.4          | 1.55     | 38.9    | 135        | 3                     | 3  | 77.66 | 85.72 | 76    | 82    | 0.82 | 0.9  | -3.83 | 8.94  |
| 126    | 1524084    | good               | no         | 63  | no    | female | right       | no              | no                   | yes      | yes            | 21.91 | 14.2          | 1.43     | 40      | 118        | 1                     | 1  | 83.79 | 89.17 | 81    | 89    | 0.85 | 0.83 | 3.27  | 5.23  |
| 127    | 1524382    | good               | no         | 65  | no    | female | left        | no              | no                   | no       | yes            | 22.43 | 20.1          | 1.39     | 41.9    | 122        | 1                     | 3  | 77.79 | 84.69 | 76    | 82    | 0.76 | 0.72 | 9.15  | 5.12  |
| 128    | 1526241    | good               | no         | 65  | no    | female | right       | no              | yes                  | no       | no             | 22.89 | 15.4          | 1.3      | 37.4    | 120        | 2                     | 1  | 80.9  | 87.31 | 78    | 88    | 1.18 | 0.8  | 8.12  | 8.52  |
| 129    | 1526864    | good               | yes        | 66  | no    | female | right       | no              | yes                  | no       | no             | 21.88 | 12.6          | 1.25     | 44.6    | 125        | 1                     | 3  | 75.52 | 82.62 | 78    | 81    | 1.04 | 1.13 | 3.49  | 6.37  |
| 130    | 1527174    | bad                | no         | 61  | no    | female | left        | no              | no                   | no       | no             | 20.82 | 18.5          | 1.34     | 33.2    | 111        | 3                     | 2  | 82.48 | 88.76 | 73    | 77    | 0.85 | 1.02 | 6.48  | 7.32  |
| 131    | 1527230    | good               | no         | 64  | no    | female | left        | no              | yes                  | yes      | no             | 24.03 | 21.3          | 1.34     | 33.1    | 95         | 2                     | 3  | 78.69 | 86.34 | 73    | 81    | 1.18 | 1.12 | -2.82 | 8.57  |
| 132    | 1527312    | bad                | yes        | 74  | yes   | male   | left        | yes             | no                   | no       | no             | 25.06 | 16.4          | 1.08     | 37.3    | 139        | 2                     | 3  | 68.34 | 78.28 | 66    | 72    | 0.83 | 1.05 | 6.44  | 16.79 |
| 133    | 1530289    | good               | no         | 63  | no    | female | right       | no              | no                   | no       | no             | 19.78 | 18.2          | 1.2      | 34.6    | 116        | 2                     | 3  | 85.17 | 90.62 | 88    | 95    | 1.04 | 0.75 | 7.4   | 10.51 |
| 134    | 1531547    | good               | no         | 62  | no    | male   | right       | no              | no                   | no       | no             | 22.6  | 36.5          | 1.66     | 39.8    | 128        | 2                     | 3  | 81.59 | 86.28 | 86    | 91    | 1.02 | 0.83 | 7.99  | 9.38  |

| Number | Patient ID | Functional outcome | Sarcopenia | Age | ≥ 70y | Sex    | Affect side | Cardiac disease | Hypertensive disease | Diabetes | Hyperlipidemia | Bmi   | Grip strength | tmCSA/BW | Albumin | Hemoglobin | Wait time for surgery | AO | R3    | R6    | HSS 3 | HSS 6 | IS   | BP   | CA    | LFA   |
|--------|------------|--------------------|------------|-----|-------|--------|-------------|-----------------|----------------------|----------|----------------|-------|---------------|----------|---------|------------|-----------------------|----|-------|-------|-------|-------|------|------|-------|-------|
| 135    | 1531080    | good               | no         | 65  | no    | female | right       | no              | yes                  | no       | yes            | 19.53 | 14.8          | 1.66     | 37.2    | 125        | 1                     | 3  | 83.59 | 88.9  | 91    | 98    | 1.16 | 1.05 | -2.46 | 4.18  |
| 136    | 1530910    | good               | yes        | 60  | no    | male   | right       | no              | no                   | no       | yes            | 23.24 | 27.3          | 1.14     | 36.4    | 165        | 2                     | 3  | 79.17 | 83.03 | 80    | 84    | 0.92 | 0.69 | 5.07  | 11.17 |
| 137    | 1534317    | good               | no         | 70  | yes   | female | left        | yes             | no                   | no       | no             | 25.39 | 17.5          | 1.42     | 37      | 127        | 1                     | 1  | 72.9  | 78.83 | 75    | 85    | 0.91 | 0.83 | -3.58 | 5.41  |
| 138    | 1535519    | good               | yes        | 61  | no    | male   | left        | no              | no                   | yes      | yes            | 19.72 | 21.1          | 1.54     | 32.2    | 126        | 1                     | 2  | 82.9  | 90.83 | 81    | 82    | 0.92 | 0.96 | 3.15  | 4.27  |
| 139    | 1536787    | good               | no         | 74  | yes   | male   | left        | no              | no                   | no       | no             | 24.82 | 28.5          | 1.35     | 33.3    | 167        | 2                     | 3  | 75.59 | 79.86 | 76    | 84    | 1    | 0.88 | 5.31  | 9.04  |
| 140    | 1537753    | good               | no         | 63  | no    | female | left        | yes             | yes                  | no       | no             | 22.23 | 16.4          | 1.54     | 47.9    | 142        | 1                     | 3  | 79.17 | 86    | 86    | 92    | 0.89 | 1.12 | 4.58  | 7.13  |
| 141    | 1540462    | good               | no         | 64  | no    | male   | left        | no              | yes                  | no       | yes            | 24.22 | 32.7          | 1.62     | 44.1    | 174        | 1                     | 3  | 80.83 | 84.48 | 89    | 94    | 0.92 | 0.93 | 3.51  | 13.25 |
| 142    | 1540848    | good               | no         | 64  | no    | male   | left        | no              | no                   | no       | no             | 17.76 | 34.5          | 1.88     | 33.9    | 147        | 2                     | 3  | 87.1  | 92.97 | 91    | 96    | 1.17 | 0.8  | -2.62 | 6.52  |
| 143    | 1542701    | good               | no         | 60  | no    | male   | left        | no              | yes                  | no       | yes            | 29.4  | 30.8          | 1.25     | 40      | 143        | 4                     | 2  | 77.17 | 83.72 | 94    | 98    | 0.9  | 0.77 | 10.06 | 4.59  |
| 144    | 1543711    | good               | no         | 60  | no    | male   | left        | yes             | yes                  | no       | no             | 22.86 | 23.2          | 1.59     | 41.2    | 151        | 4                     | 3  | 80.97 | 87.38 | 93    | 96    | 1.04 | 0.96 | 4.88  | 4.69  |
| 145    | 417095     | good               | no         | 65  | no    | female | left        | no              | no                   | no       | no             | 22.58 | 21.7          | 1.35     | 41.6    | 127        | 1                     | 1  | 72.07 | 78.07 | 87    | 91    | 0.76 | 1.14 | 4.71  | 8.52  |
| 146    | 417532     | good               | no         | 61  | no    | female | left        | no              | no                   | no       | no             | 20.55 | 20.9          | 1.23     | 42.6    | 120        | 2                     | 2  | 84.07 | 89.31 | 85    | 93    | 0.94 | 0.82 | -3.97 | 8.87  |
| 147    | 418395     | bad                | yes        | 67  | no    | female | left        | no              | no                   | no       | no             | 20.96 | 11.4          | 1.17     | 41.8    | 119        | 3                     | 3  | 77.17 | 84.55 | 69    | 75    | 0.89 | 1.11 | -3.02 | 7.3   |
| 148    | 425560     | good               | no         | 61  | no    | male   | left        | yes             | no                   | no       | no             | 22.49 | 26.3          | 1.66     | 40.3    | 126        | 5                     | 3  | 81.1  | 87.1  | 75    | 84    | 1.19 | 0.84 | 6.58  | 5.75  |
| 149    | 427804     | good               | no         | 67  | no    | male   | left        | no              | no                   | no       | yes            | 27.28 | 28.3          | 1.63     | 48      | 155        | 3                     | 2  | 78.48 | 86.14 | 78    | 86    | 1.04 | 0.84 | -0.89 | 8.27  |
| 150    | 430304     | bad                | yes        | 67  | no    | male   | right       | no              | yes                  | no       | no             | 23.03 | 21.1          | 1.36     | 39.5    | 147        | 2                     | 3  | 71.24 | 77.86 | 69    | 71    | 1.1  | 0.95 | 4.9   | 6.5   |
| 151    | 430879     | good               | no         | 60  | no    | male   | right       | no              | no                   | yes      | no             | 22.23 | 35.2          | 1.64     | 43.6    | 142        | 4                     | 3  | 77.72 | 87.45 | 95    | 98    | 0.97 | 0.79 | -3.83 | 8.87  |
| 152    | 437320     | good               | yes        | 69  | no    | female | left        | no              | no                   | no       | no             | 23.44 | 13.5          | 1.24     | 42.6    | 122        | 2                     | 1  | 72.69 | 77.52 | 70    | 84    | 0.9  | 1.14 | -2.94 | 7.2   |
| 153    | 437321     | bad                | no         | 84  | yes   | female | left        | yes             | yes                  | no       | no             | 29.14 | 15.8          | 1.27     | 43.3    | 124        | 2                     | 3  | 68.07 | 78.07 | 68    | 72    | 1.03 | 0.76 | 4.58  | 7.74  |
| 154    | 439368     | good               | no         | 62  | no    | female | left        | no              | no                   | yes      | yes            | 25.16 | 23.4          | 1.21     | 42.3    | 121        | 4                     | 3  | 80.62 | 87.31 | 93    | 94    | 1.09 | 1.12 | 5.81  | 12.78 |
| 155    | 441876     | good               | no         | 62  | no    | female | left        | no              | no                   | no       | no             | 21.48 | 18.3          | 1.31     | 44.5    | 126        | 1                     | 3  | 83.59 | 87.66 | 85    | 89    | 0.89 | 1.02 | -1.8  | 10.49 |
| 156    | 443354     | good               | no         | 60  | no    | male   | right       | no              | no                   | no       | no             | 26.99 | 36.4          | 1.6      | 41.4    | 136        | 1                     | 3  | 79.86 | 82.28 | 87    | 93    | 0.95 | 0.77 | -3.39 | 8.38  |
| 157    | 452980     | bad                | no         | 67  | no    | female | right       | no              | no                   | yes      | no             | 27.06 | 19            | 1.24     | 39.2    | 111        | 1                     | 2  | 83.66 | 92.07 | 73    | 80    | 0.81 | 0.83 | 5.55  | 8.14  |
| 158    | 454450     | good               | no         | 60  | no    | female | left        | no              | no                   | no       | no             | 26.67 | 25.3          | 1.31     | 43.2    | 125        | 1                     | 1  | 70.69 | 79.72 | 86    | 90    | 0.91 | 0.99 | 7.68  | 16.83 |
| 159    | 456742     | bad                | no         | 70  | yes   | male   | right       | no              | yes                  | no       | yes            | 20.9  | 31.2          | 1.62     | 40.3    | 148        | 4                     | 3  | 80.41 | 84.76 | 80    | 80    | 0.93 | 0.7  | -4.87 | 11.51 |
| 160    | 469428     | good               | no         | 81  | yes   | male   | right       | no              | yes                  | no       | no             | 29.37 | 34.2          | 1.62     | 37.4    | 123        | 3                     | 3  | 74.62 | 80.97 | 74    | 82    | 1.06 | 0.94 | -5.39 | 9.27  |
| 161    | 469431     | good               | yes        | 61  | no    | male   | right       | no              | yes                  | no       | no             | 19.14 | 22.7          | 1.54     | 38.9    | 124        | 3                     | 3  | 85.17 | 89.31 | 79    | 82    | 1.16 | 1.08 | 5.51  | 4.96  |
| 162    | 472720     | good               | no         | 64  | no    | male   | left        | no              | no                   | no       | no             | 23.64 | 31.1          | 1.69     | 44.4    | 127        | 1                     | 3  | 83.03 | 90.14 | 91    | 94    | 0.92 | 0.72 | -3.84 | 11.71 |
| 163    | 478338     | good               | no         | 67  | no    | female | right       | no              | yes                  | no       | no             | 19.53 | 20.4          | 1.23     | 43.7    | 110        | 3                     | 3  | 88.34 | 92.97 | 88    | 91    | 0.94 | 0.94 | 5.02  | 5.93  |
| 164    | 480338     | bad                | yes        | 64  | no    | female | right       | no              | yes                  | no       | no             | 19.53 | 14.5          | 1.21     | 44.4    | 115        | 3                     | 2  | 88.55 | 92.83 | 71    | 78    | 0.91 | 0.71 | 5.27  | 7.32  |
| 165    | 483590     | bad                | no         | 77  | yes   | male   | right       | yes             | no                   | no       | no             | 24.21 | 24.2          | 1.65     | 38.2    | 132        | 1                     | 2  | 74.14 | 81.59 | 72    | 79    | 0.93 | 0.84 | 3.47  | 6.18  |
| 166    | 485568     | good               | no         | 70  | yes   | male   | right       | no              | yes                  | no       | yes            | 27.68 | 23.9          | 1.59     | 42.6    | 134        | 5                     | 3  | 71.59 | 76.21 | 76    | 84    | 1.15 | 0.96 | 0.27  | 5.83  |
| 167    | 486498     | bad                | yes        | 76  | yes   | male   | left        | yes             | yes                  | no       | no             | 22.59 | 15.3          | 1.47     | 40.1    | 134        | 1                     | 3  | 68.48 | 73.17 | 63    | 65    | 1.14 | 1.21 | -5.69 | 10.12 |
| 168    | 485605     | good               | no         | 60  | no    | female | left        | no              | no                   | yes      | yes            | 19.11 | 21.6          | 1.78     | 40.9    | 118        | 6                     | 3  | 85.31 | 91.86 | 87    | 91    | 1.25 | 0.96 | -1.53 | 7.49  |

IS(Insall-Salvati index)

BP(Blackburne-Peel index)

CA(Congruence angle)

LFA(Lateral patellofemoral angle)
